# Supplementary material
Source: publisher figshare collection journal article supplement (https://tandf.figshare.com/articles/dataset/_/21359952)
Supplement: Supplementary file 2 [file 1]

Table 1a

|         | Weeks<br>after birth | 9W    |      | 10W    |       | 11W    |       | 12W    |       | 13W    |       | 14W   |       | 15W    |       | 16W    |       | 17W    |       | 18W    |       |
|---------|----------------------|-------|------|--------|-------|--------|-------|--------|-------|--------|-------|-------|-------|--------|-------|--------|-------|--------|-------|--------|-------|
|         | N=5                  | Mean  | SE   | Mean   | SE    | Mean   | SE    | Mean   | SE    | Mean   | SE    | Mean  | SE    | Mean   | SE    | Mean   | SE    | Mean   | SE    | Mean   | SE    |
| Glucose | NC                   | 82.80 | 4.42 | 68.00  | 17.43 | 80.60  | 3.43  | 82.80  | 4.42  | 83.80  | 2.06  | 83.20 | 3.20  | 81.20  | 2.84  | 85.60  | 2.38  | 88.00  | 3.75  | 88.00  | 3.75  |
|         | PC                   | 88.20 | 5.32 | 86.20  | 4.72  | 309.00 | 36.19 | 314.80 | 24.50 | 49.20  | 8.59  | 28.40 | 4.95  | 81.60  | 12.24 | 183.20 | 54.69 | 329.80 | 24.35 | 295.80 | 15.65 |
|         | BMSCs                | 86.20 | 3.20 | 87.20  | 3.34  | 262.60 | 25.52 | 61.20  | 9.86  | 35.40  | 3.59  | 36.20 | 9.52  | 122.60 | 35.23 | 364.80 | 8.77  | 382.20 | 17.65 | 370.20 | 14.58 |
|         | 2D BMSCs             | 86.80 | 2.67 | 95.00  | 1.70  | 213.40 | 29.96 | 80.00  | 16.52 | 31.40  | 5.05  | 36.40 | 9.69  | 173.00 | 38.08 | 400.80 | 11.09 | 422.40 | 15.88 | 365.60 | 13.88 |
|         | 3D BMSCs             | 84.40 | 2.91 | 100.00 | 2.70  | 222.20 | 34.04 | 112.60 | 21.63 | 37.00  | 6.52  | 32.00 | 5.97  | 89.80  | 14.36 | 357.00 | 18.59 | 370.80 | 14.24 | 379.40 | 15.36 |
|         | DPSCs                | 91.20 | 3.41 | 87.40  | 2.42  | 254.00 | 39.27 | 340.40 | 21.71 | 49.80  | 3.89  | 45.40 | 4.76  | 57.60  | 16.90 | 99.00  | 29.01 | 321.40 | 24.60 | 332.60 | 36.46 |
|         | 2D DPSCs             | 88.40 | 4.27 | 84.80  | 5.62  | 225.20 | 87.73 | 348.80 | 18.06 | 111.60 | 20.92 | 60.20 | 6.16  | 57.80  | 9.56  | 116.60 | 41.63 | 345.40 | 7.19  | 298.20 | 34.16 |
|         | 3D DPSCs             | 94.20 | 2.50 | 84.00  | 7.06  | 213.60 | 22.38 | 362.20 | 22.56 | 55.80  | 10.70 | 58.80 | 11.60 | 57.40  | 17.27 | 105.40 | 26.83 | 283.80 | 58.51 | 163.40 | 7.70  |
