# Supplementary material
Source: publisher figshare collection journal article supplement (https://tandf.figshare.com/articles/dataset/_/21359952)
Supplement: Supplementary file 3 [file 1]

Table 2b

| Ketones (9W)<br>(18W) | NC  | PC  | BMSCs | 2D<br>BMSCs | 3D<br>BMSCs | DPSCs | 2D<br>DPSCs | 3D<br>DPSCs |
|-----------------------|-----|-----|-------|-------------|-------------|-------|-------------|-------------|
| NC                    |     | N.S | N.S   | N.S         | N.S         | N.S   | N.S         | N.S         |
| PC                    | N.S |     | N.S   | N.S         | N.S         | N.S   | N.S         | N.S         |
| BMSCs                 | N.S | N.S |       | N.S         | N.S         | N.S   | N.S         | N.S         |
| 2D BMSCs              | N.S | N.S | N.S   |             | N.S         | N.S   | N.S         | N.S         |
| 3D BMSCs              | N.S | N.S | N.S   | N.S         |             | N.S   | N.S         | N.S         |
| DPSCs                 | N.S | N.S | N.S   | N.S         | N.S         |       | N.S         | N.S         |
| 2D DPSCs              | N.S | N.S | N.S   | N.S         | N.S         | N.S   |             | N.S         |
| 3D DPSCs              | N.S | N.S | N.S   | N.S         | N.S         | N.S   | N.S         |             |
