# Supplementary material
Source: publisher figshare collection journal article supplement (https://tandf.figshare.com/articles/dataset/_/21359952)
Supplement: Supplementary file 4 [file 1]

Table 3b

| water consumption<br>(9W)<br>(18W) | NC     | PC     | BMSCs  | 2D<br>BMSCs | 3D<br>BMSCs | DPSCs | 2D<br>DPSCs | 3D<br>DPSCs |
|------------------------------------|--------|--------|--------|-------------|-------------|-------|-------------|-------------|
| NC                                 |        | N.S    | N.S    | N.S         | N.S         | N.S   | N.S         | N.S         |
| PC                                 | P<0.01 |        | N.S    | N.S         | N.S         | N.S   | N.S         | N.S         |
| BMSCs                              | P<0.01 | N.S    |        | N.S         | N.S         | N.S   | N.S         | N.S         |
| 2D BMSCs                           | P<0.01 | N.S    | N.S    |             | N.S         | N.S   | N.S         | N.S         |
| 3D BMSCs                           | P<0.01 | N.S    | N.S    | N.S         |             | N.S   | N.S         | N.S         |
| DPSCs                              | N.S    | N.S    | N.S    | P<0.01      | P<0.05      |       | N.S         | N.S         |
| 2D DPSCs                           | P<0.05 | N.S    | N.S    | N.S         | N.S         | N.S   |             | N.S         |
| 3D DPSCs                           | N.S    | P<0.01 | P<0.01 | P<0.01      | P<0.01      | N.S   | N.S         |             |
