# Supplementary material
Source: publisher figshare collection journal article supplement (https://tandf.figshare.com/articles/dataset/_/21359952)
Supplement: Supplementary file 6 [file 1]

Table 3a

|                   | Weeks after birth | 9W    |      | 10W   |      | 11W   |      | 12W    |       | 13W   |       | 14W   |      | 15W   |      | 16W    |       | 17W    |       | 18W    |       |
|-------------------|-------------------|-------|------|-------|------|-------|------|--------|-------|-------|-------|-------|------|-------|------|--------|-------|--------|-------|--------|-------|
|                   | N=5               | Mean  | SE   | Mean  | SE   | Mean  | SE   | Mean   | SE    | Mean  | SE    | Mean  | SE   | Mean  | SE   | Mean   | SE    | Mean   | SE    | Mean   | SE    |
| Water consumption | NC                | 25.40 | 1.29 | 26.40 | 0.59 | 29.52 | 2.36 | 29.80  | 0.73  | 28.60 | 0.24  | 27.80 | 0.86 | 30.20 | 1.36 | 28.20  | 1.88  | 26.13  | 2.62  | 32.20  | 0.66  |
|                   | PC                | 29.60 | 0.75 | 27.66 | 0.44 | 28.48 | 0.67 | 124.00 | 22.69 | 96.80 | 12.54 | 37.20 | 1.77 | 34.20 | 0.49 | 31.80  | 1.16  | 81.00  | 9.15  | 102.40 | 15.14 |
|                   | BMSCs             | 28.03 | 0.48 | 28.97 | 0.35 | 28.23 | 0.61 | 129.26 | 10.54 | 51.40 | 5.05  | 28.70 | 2.75 | 41.53 | 7.88 | 113.68 | 3.69  | 111.21 | 5.45  | 105.95 | 6.38  |
|                   | 2D BMSCs          | 32.53 | 4.10 | 32.14 | 3.65 | 28.82 | 0.89 | 132.20 | 10.64 | 78.93 | 18.60 | 35.03 | 4.06 | 54.77 | 5.36 | 107.02 | 22.19 | 117.88 | 7.28  | 126.13 | 10.39 |
|                   | 3D BMSCs          | 28.57 | 2.02 | 32.44 | 2.50 | 29.69 | 2.10 | 109.12 | 7.06  | 75.16 | 11.67 | 35.15 | 1.56 | 38.62 | 5.45 | 106.21 | 8.81  | 101.18 | 5.98  | 112.67 | 6.79  |
|                   | DPSCs             | 25.96 | 0.55 | 26.99 | 0.99 | 27.90 | 1.06 | 68.85  | 12.44 | 67.15 | 14.16 | 35.12 | 1.89 | 28.79 | 1.64 | 32.99  | 3.22  | 37.95  | 1.81  | 65.49  | 12.37 |
|                   | 2D DPSCs          | 28.83 | 0.70 | 29.65 | 0.80 | 29.64 | 1.60 | 90.76  | 22.15 | 80.81 | 5.11  | 50.23 | 5.14 | 25.98 | 6.37 | 37.33  | 2.48  | 36.34  | 10.15 | 87.27  | 2.17  |
|                   | 3D DPSCs          | 28.51 | 1.37 | 21.20 | 5.08 | 29.84 | 2.53 | 106.11 | 3.64  | 68.47 | 6.02  | 32.59 | 7.72 | 37.40 | 4.02 | 34.11  | 1.87  | 38.57  | 3.96  | 48.86  | 13.26 |
