# Supplementary material
Source: publisher figshare collection journal article supplement (https://tandf.figshare.com/articles/dataset/_/21359952)
Supplement: Supplementary file 7 [file 1]

Table 2a

|         | Weeks<br>after birth | 9W   |      | 10W  |      | 11W  |      | 12W  |      | 13W  |      | 14W  |      | 15W  |      | 16W  |      | 17W  |      | 18W  |      |
|---------|----------------------|------|------|------|------|------|------|------|------|------|------|------|------|------|------|------|------|------|------|------|------|
|         | N=5                  | Mean | SE   |
| Ketones | NC                   | 0.82 | 0.10 | 0.82 | 0.10 | 0.60 | 0.05 | 0.78 | 0.06 | 0.80 | 0.03 | 0.72 | 0.02 | 0.84 | 0.09 | 0.60 | 0.05 | 0.56 | 0.04 | 0.66 | 0.07 |
|         | PC                   | 0.78 | 0.08 | 0.76 | 0.02 | 0.98 | 0.04 | 0.90 | 0.08 | 0.66 | 0.04 | 0.70 | 0.00 | 0.72 | 0.04 | 1.28 | 0.31 | 1.18 | 0.21 | 1.46 | 0.41 |
|         | BMSCs                | 0.78 | 0.04 | 0.90 | 0.10 | 1.52 | 0.32 | 0.64 | 0.04 | 0.72 | 0.02 | 0.70 | 0.00 | 0.68 | 0.04 | 2.10 | 0.69 | 1.04 | 0.21 | 1.28 | 0.30 |
|         | 2D BMSCs             | 0.72 | 0.05 | 0.86 | 0.09 | 2.24 | 0.85 | 0.68 | 0.06 | 0.76 | 0.05 | 0.66 | 0.04 | 0.74 | 0.09 | 2.42 | 0.90 | 1.02 | 0.14 | 1.08 | 0.16 |
|         | 3D BMSCs             | 0.86 | 0.06 | 0.80 | 0.04 | 1.60 | 0.14 | 0.56 | 0.05 | 0.72 | 0.02 | 0.78 | 0.02 | 0.72 | 0.02 | 2.04 | 0.74 | 1.34 | 0.38 | 1.64 | 0.47 |
|         | DPSCs                | 1.22 | 0.12 | 1.00 | 0.08 | 1.40 | 0.23 | 0.72 | 0.07 | 0.70 | 0.04 | 0.78 | 0.07 | 0.74 | 0.09 | 1.50 | 0.39 | 2.42 | 0.95 | 1.36 | 0.29 |
|         | 2D DPSCs             | 1.00 | 0.18 | 0.86 | 0.06 | 2.52 | 1.10 | 0.86 | 0.09 | 0.86 | 0.04 | 0.70 | 0.09 | 0.78 | 0.06 | 1.22 | 0.06 | 0.96 | 0.14 | 1.04 | 0.07 |
|         | 3D DPSCs             | 0.96 | 0.14 | 0.94 | 0.12 | 1.60 | 0.35 | 0.80 | 0.07 | 0.80 | 0.03 | 0.90 | 0.08 | 0.78 | 0.02 | 1.24 | 0.31 | 1.62 | 0.47 | 1.06 | 0.26 |
