# Supplementary material
Source: publisher figshare collection journal article supplement (https://tandf.figshare.com/articles/dataset/_/21359952)
Supplement: Supplementary file 8 [file 1]

Table 4a

| OGTT     | 0 min. |       | 15 min. |       | 30 min. |       | 60 min. |       | 120 min. |       |
|----------|--------|-------|---------|-------|---------|-------|---------|-------|----------|-------|
| N=5      | Mean   | SE    | Mean    | SE    | Mean    | SE    | Mean    | SE    | Mean     | SE    |
| NC       | 71.20  | 1.80  | 93.00   | 1.48  | 106.40  | 2.29  | 108.80  | 2.73  | 77.40    | 3.12  |
| PC       | 303.80 | 12.25 | 386.20  | 20.66 | 411.60  | 17.35 | 422.60  | 32.37 | 362.00   | 20.23 |
| BMSCs    | 233.00 | 21.67 | 364.60  | 22.65 | 467.40  | 31.02 | 505.00  | 23.89 | 392.60   | 12.38 |
| 2D BMSCs | 267.40 | 20.81 | 331.20  | 20.50 | 381.60  | 55.00 | 456.00  | 35.61 | 407.60   | 26.50 |
| 3D BMSCs | 295.60 | 12.35 | 315.20  | 32.91 | 384.80  | 30.00 | 447.80  | 21.61 | 371.20   | 24.26 |
| DPSCs    | 275.20 | 29.70 | 304.40  | 23.60 | 386.80  | 20.53 | 391.40  | 33.14 | 305.40   | 14.78 |
| 2D DPSCs | 225.40 | 10.59 | 334.80  | 24.83 | 347.80  | 26.29 | 370.80  | 40.87 | 324.20   | 44.00 |
| 3D DPSCs | 89.20  | 11.20 | 128.20  | 23.35 | 172.00  | 30.91 | 201.80  | 31.24 | 134.00   | 30.90 |
